# Supplementary material
Source: PubMed Central journal article supplement (PMC11626283)
Supplement: ajcr0014-5269-f8.pdf [file ajcr0014-5269-f8.pdf]

# Quercetin inhibited ORM2 in TNBC

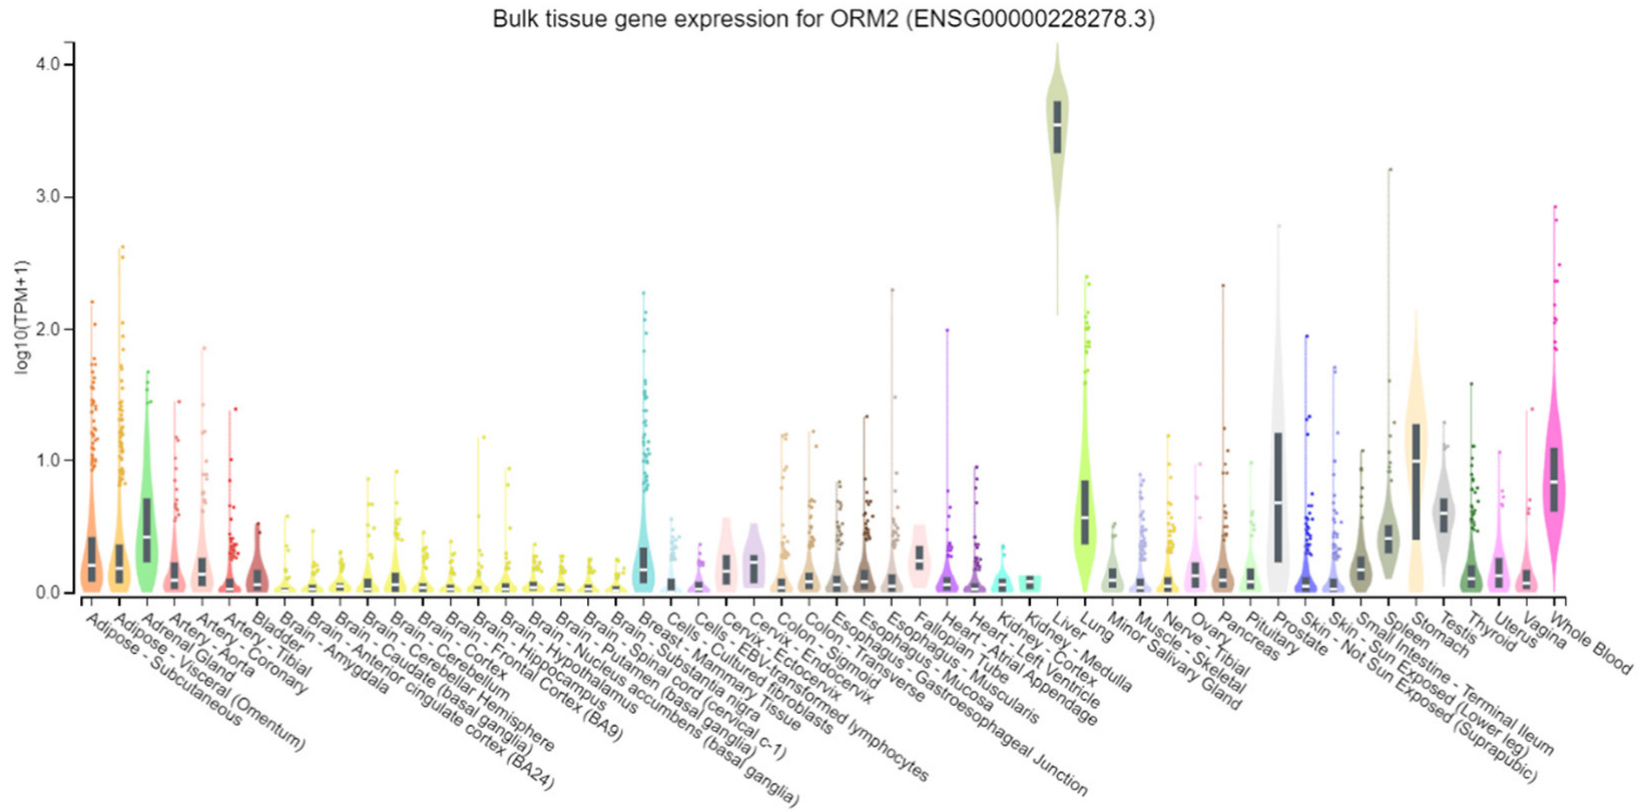

Supplementary Figure 1. Expression of ORM2 in human tissues. Data were accessed from the GETx database.
